# Supplementary material for: A randomized clinical trial of photobiomodulation therapy combined with continuous microlens radial array lenses for myopia control in children
Source: Research Square preprint supplement (doi:10.21203/rs.3.rs-7023715/v1), 2025-07-23
Supplement: Supplementary file 1 [file 9b4fd4a8f7ca623dfcaf2186.docx]

Table 2. Change in ocular parameters at 1-, 3-, 6-month follow-up of four groups.

|  | **PBMT+CMRA** | **PBMT+SVS** | **CMRA** | **SVS** | *P* |
| --- | --- | --- | --- | --- | --- |
| *Change of AL at 6-month (mm)* | 2# | ±0.36 | +0.15±0.07* | * | 01 |
| *Change of SE at 6-month (D)* | 1# | # | -0.640.24* | -0.3042 | 1 |
| *Change of VA at 6-month* | 0.01 | 0.05 | 0.000.05 | +0.03 |  |
| *Change of AL at 3-month*  *(mm)* | # | 0.07 | +0.090.09* | 0.05* | 1 |
| *Change of AL at 1-month (mm)* | 0.09# | 0.05# | +0.050.0** | +0.05* | 3 |

Footnote: Results are presented as mean standard deviation. AL: axial length; SE: spherical equivalence.

*Significant difference (P<0.05) when compared with Group PBMT+CMRA; #Significant difference (P<0.05) when compared with Group CMRA.
